# Supplementary material for: Multidimensional B4N materials as novel anode materials for lithium ion batteries
Source: Royal Society of Chemistry journal article supplement (doi:10.1039/d0cp02668a), 2020-01-01
Supplement: d0cp02668a1.pdf [file d0cp02668a1.pdf]

## Supporting Information

### Multidimensional B<sub>4</sub>N as novel anode materials for lithium ion batteries

Jiyuan Guo\*, Binwei Tian, Huabing Shu, Ying Wang, Jun Dai

School of science, Jiangsu University of Science and Technology, Zhenjiang, 212003, China

\*Corresponding author: jyguo@just.edu.cn

**Table S1.** Cell parameters, bond length and properties of band structure of unit cell of B<sub>4</sub>N.

|           | a (Å) | b (Å) | B-N (Å) | B-B (Å)   | Band Structure    |
|-----------|-------|-------|---------|-----------|-------------------|
| Our work  | 2.98  | 10.74 | 1.33    | 1.67/1.81 | nonmagnetic metal |
| Ref. [20] | 2.97  | 10.70 | 1.33    | 1.65/1.81 | nonmagnetic metal |

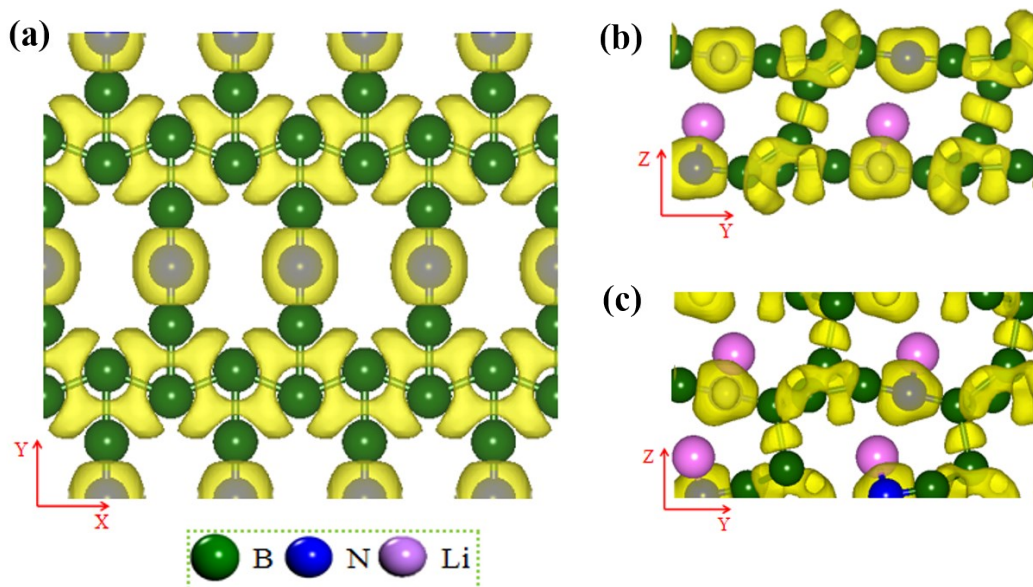

**Fig. S1** Electron localization function of pristine monolayer B<sub>4</sub>N (a), lithiation of bilayer (b) and bulk B<sub>4</sub>N (c). Yellows are the local electrons with the isosurface of 0.72 e/Å<sup>3</sup>.

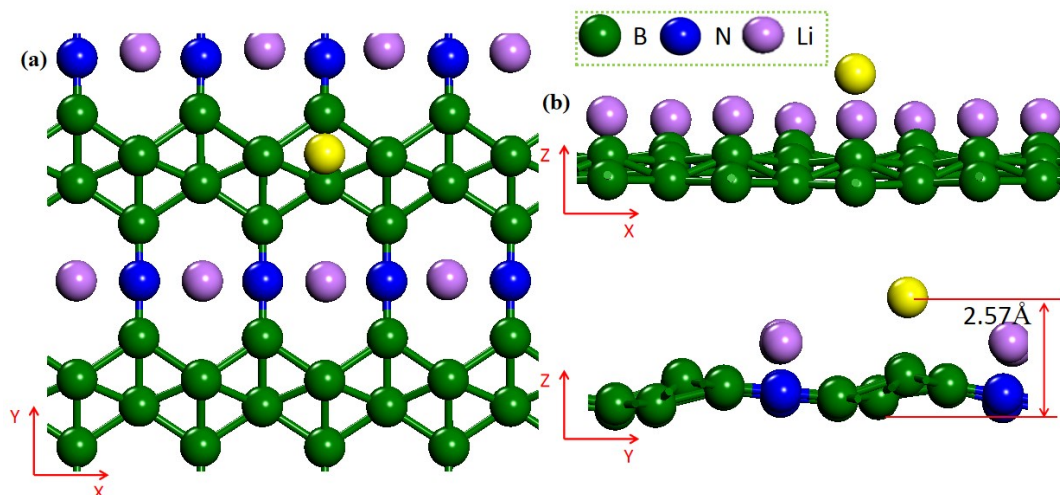

**Fig. S2** Deposition of the ninth Li atom (yellow sphere) would result in a seed for the second layer. (a) Top view and (b) side view.

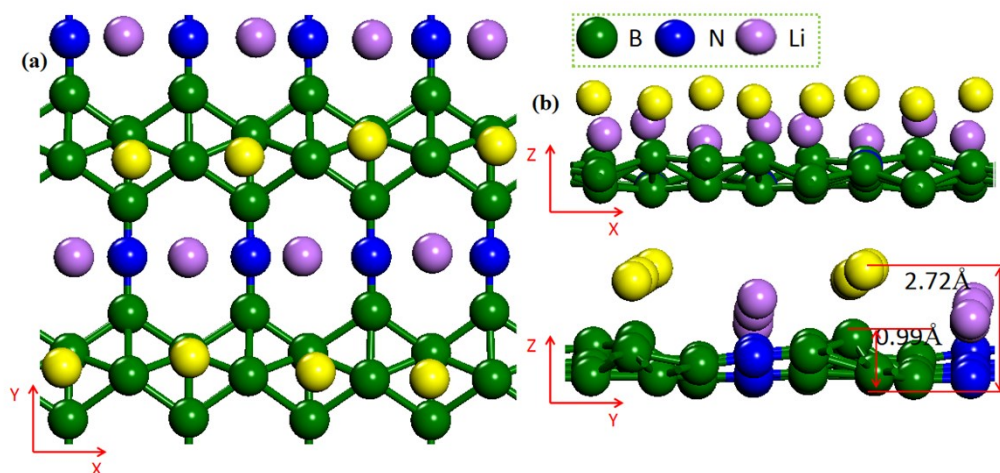

**Fig. S3** After the complete second Li layer is formed, there are sixteen Li atoms on the substrate. (a) Top view and (b) side view.

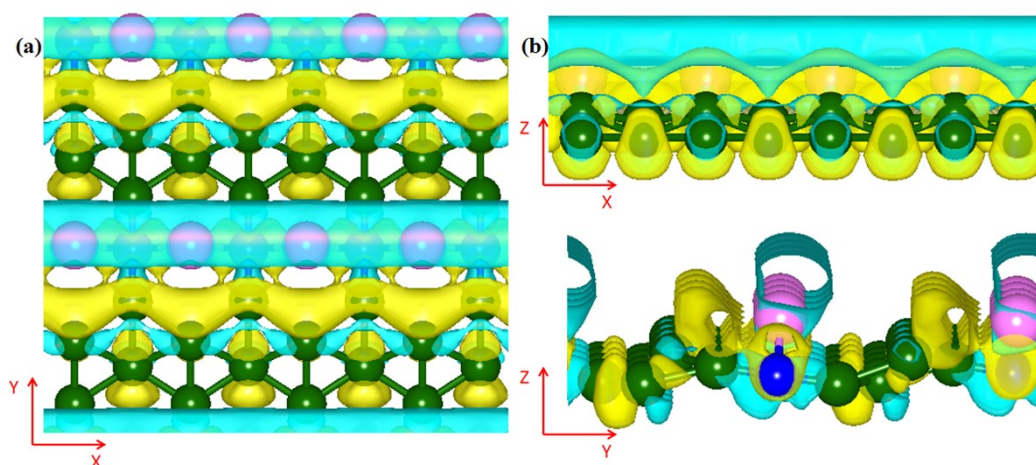

**Fig. S4** Charge density difference plots of eight Li atom adsorbed on B<sub>4</sub>N monolayer. The yellow and cyan areas denote electron accumulation and depletion with the isosurface level of  $1.5 \times 10^{-3} e/\text{\AA}^3$ . (a) Top view and (b) side view.

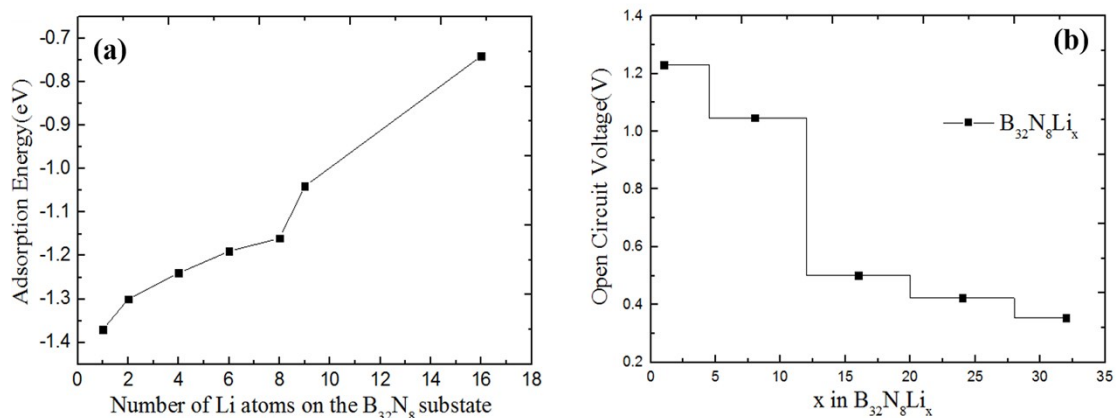

**Fig. S5** (a) Adsorption energy and (b) open circuit voltage profiles of  $B_{32}N_8Li_x$  as a function of Li concentration ( $x$ ).

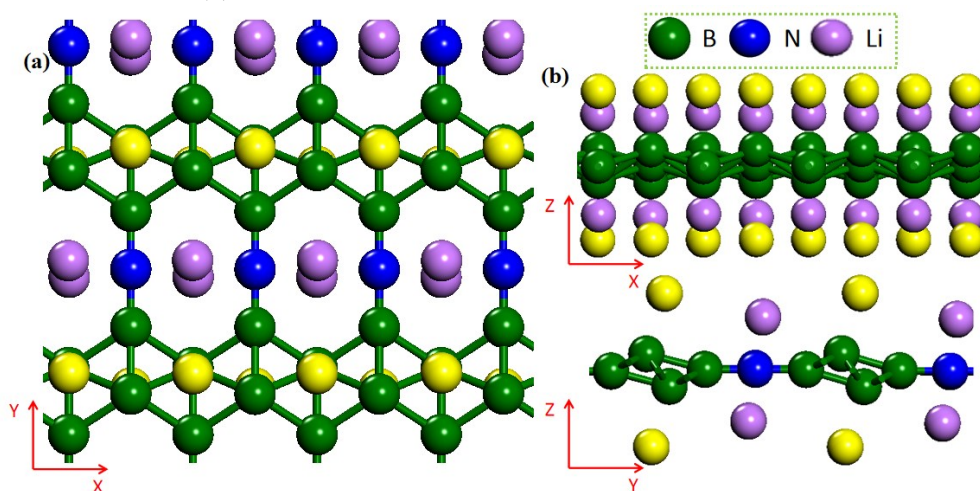

**Fig. S6** Two layers of Li atoms were adsorbed on each side of the monolayer  $B_4N$  substrate. (a) Top view and (b) side view. Yellow spheres are denoted as the second layer of Li atoms.

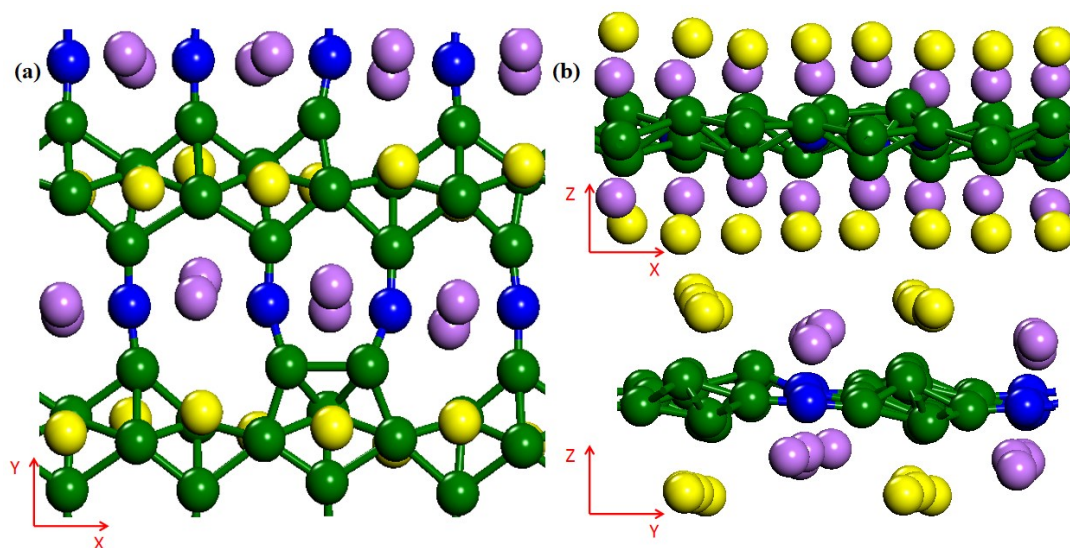

**Fig. S7** AIMD simulation structures including the two layers of Li adsorption on each side at temperature of 350 K after 5 ps. (a) Top view and (b) side view. Yellow spheres are denoted as the second layer of Li atoms.

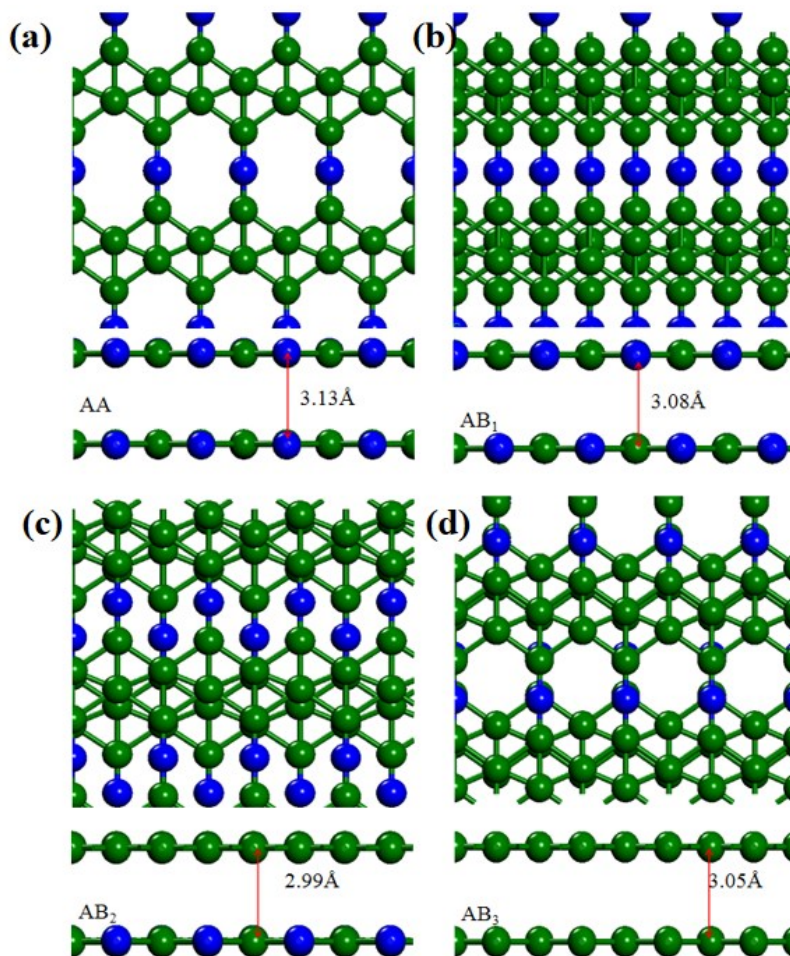

**Fig. S8** Top and side views of optimized structure for bilayer  $B_4N$  with different stacking configuration.

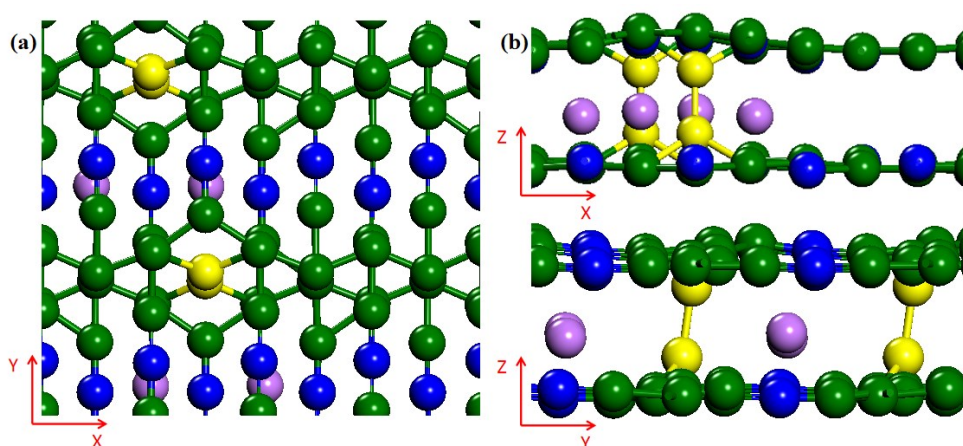

**Fig. S9** The optimized structure for bilayer  $B_4N$  with four Li atoms adsorption. (a) Top view and (b) side view. Yellow spheres are the connected B atoms between up and down.

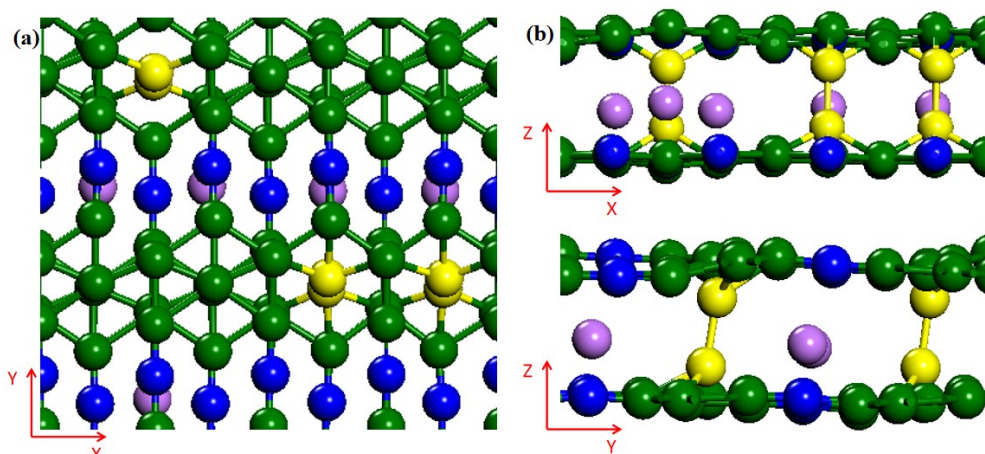

**Fig. S10** The optimized structure for bilayer  $B_4N$  with five Li atoms adsorption. (a) Top view and (b) side view. Yellow spheres are the connected B atoms between up and down.

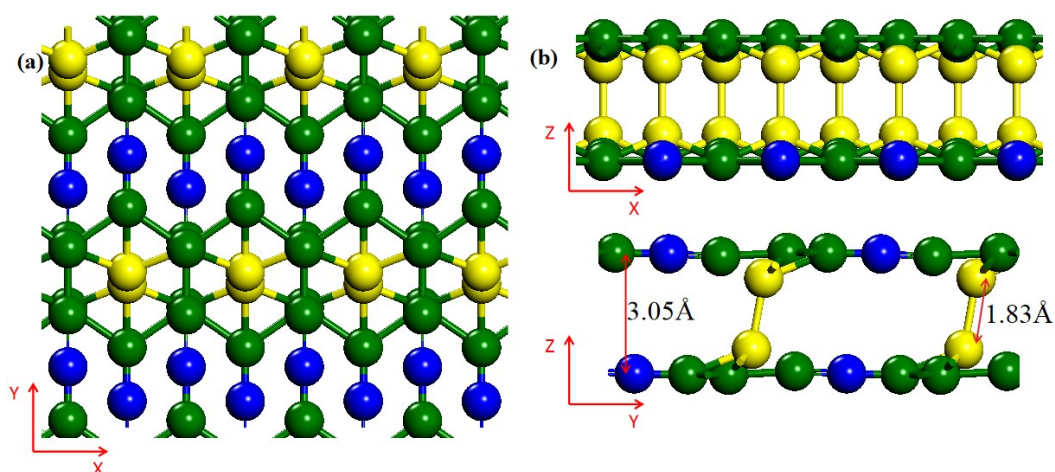

**Fig. S11** Optimized bilayer  $B_4N$  after removing all the adsorbed Li atoms. (a) Top view and (b) side view. Yellow spheres are the connected B atoms between up and down.

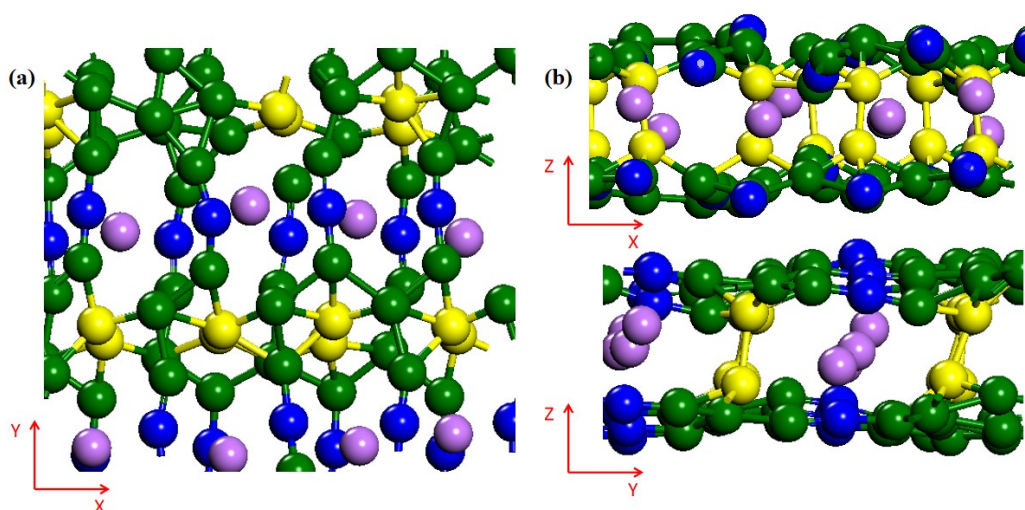

**Fig. S12** AIMD simulation structures including the bilayer  $B_4N$  with saturation Li adsorption at temperature of 350 K after 5 ps. (a) Top view and (b) side view. Yellow spheres are the connected B atoms between up and down.

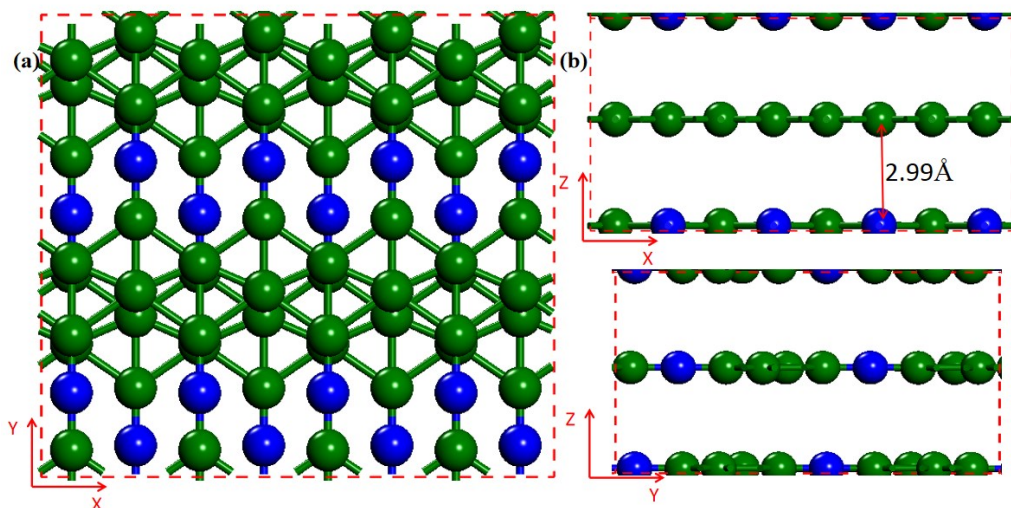

**Fig. S13** The optimized layered bulk  $B_4N$  structures. (a) Top view and (b) side view.

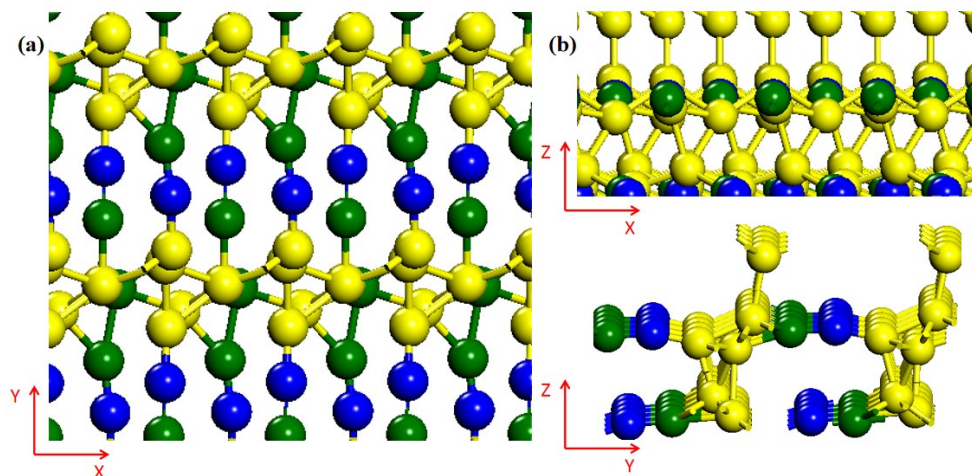

**Fig. S14** Optimized bulk  $B_4N$  after removing all the adsorbed Li atoms. (a) Top view and (b) side view. Yellow spheres are the connected B atoms between up and down.

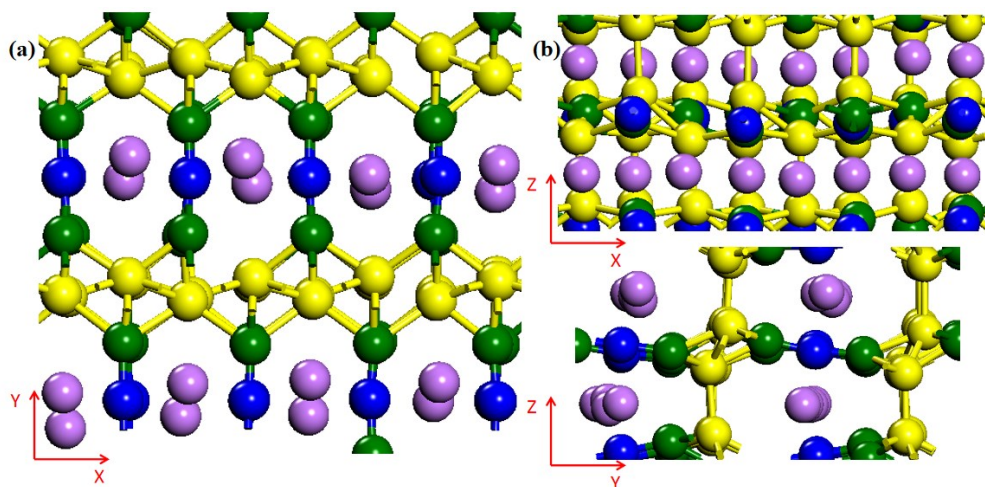

**Fig. S15** AIMD simulation structures for the bulk  $B_4N$  with saturation Li adsorption at temperature of 350 K after 5 ps. (a) Top view and (b) side view. Yellow spheres are the connected B atoms between up and down.

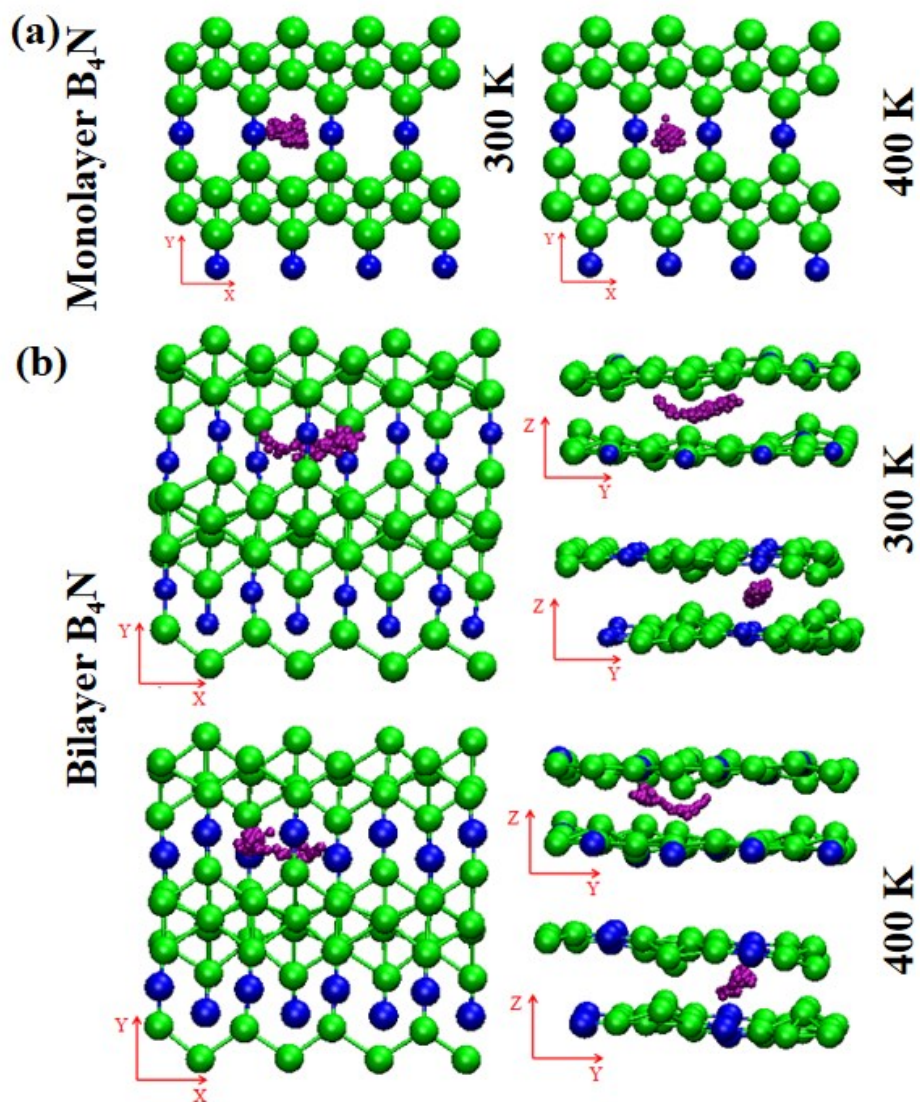

**Fig. S16** Views of single Li atom movement on the monolayer (a) and bilayer  $B_4N$  (b) during the AIMD calculations of 300 K and 400 K. The purple messy point trajectories show the movement of the Li atom for 5000 fs. The green and blue spheres are the B and N atoms and they are shown as a solid background.
